# Supplementary material for: Antiplatelet Activity of a Newly Synthesized Novel Ruthenium (II): A Potential Role for Akt/JNK Signaling
Source: PubMed Central journal article supplement (PMC5454829; doi:10.3390/ijms18050916), 2017-04-27
Supplement: ijms-18-00916-s001.pdf [file ijms-18-00916-s001.pdf]

## Supporting Information

### Antiplatelet activity of a newly synthesized novel ruthenium (II) complex: potential role for Akt/JNK signaling

Themmila Khamrang<sup>1,2\*</sup>, Kuo-Chen Hung<sup>3\*</sup>, Chih-Hsuan Hsia<sup>2</sup>, Cheng-Ying Hsieh<sup>2</sup>, Marappan Velusamy<sup>1</sup> Thanasekaran Jayakumar<sup>2</sup> and Joen-Rong Sheu<sup>2</sup>

<sup>1</sup>Department of Chemistry, North Eastern Hill University, Shillong 793022, India; E-Mail: themmilakhamrang@gmail.com (T.K); mvelusamy@gmail.com (M.V)

<sup>2</sup>Graduate Institute of Medical Sciences and Department of Pharmacology, College of Medicine, Taipei Medical University, Taipei, Taiwan; E-Mail: d119102013@tmu.edu.tw (C.-H.H); hsiehcy@tmu.edu.tw (C.-Y.H); tjaya\_2002@yahoo.co.in (T.J); sheujr@tmu.edu.tw (J.-S.R)

<sup>3</sup>Gastroenterologic Surgery Division, Department of Surgery, Yuan's General Hospital, Kaohsiung 249, Taiwan; E-Mail: hcc4723@gmail.com (K.-C.H)

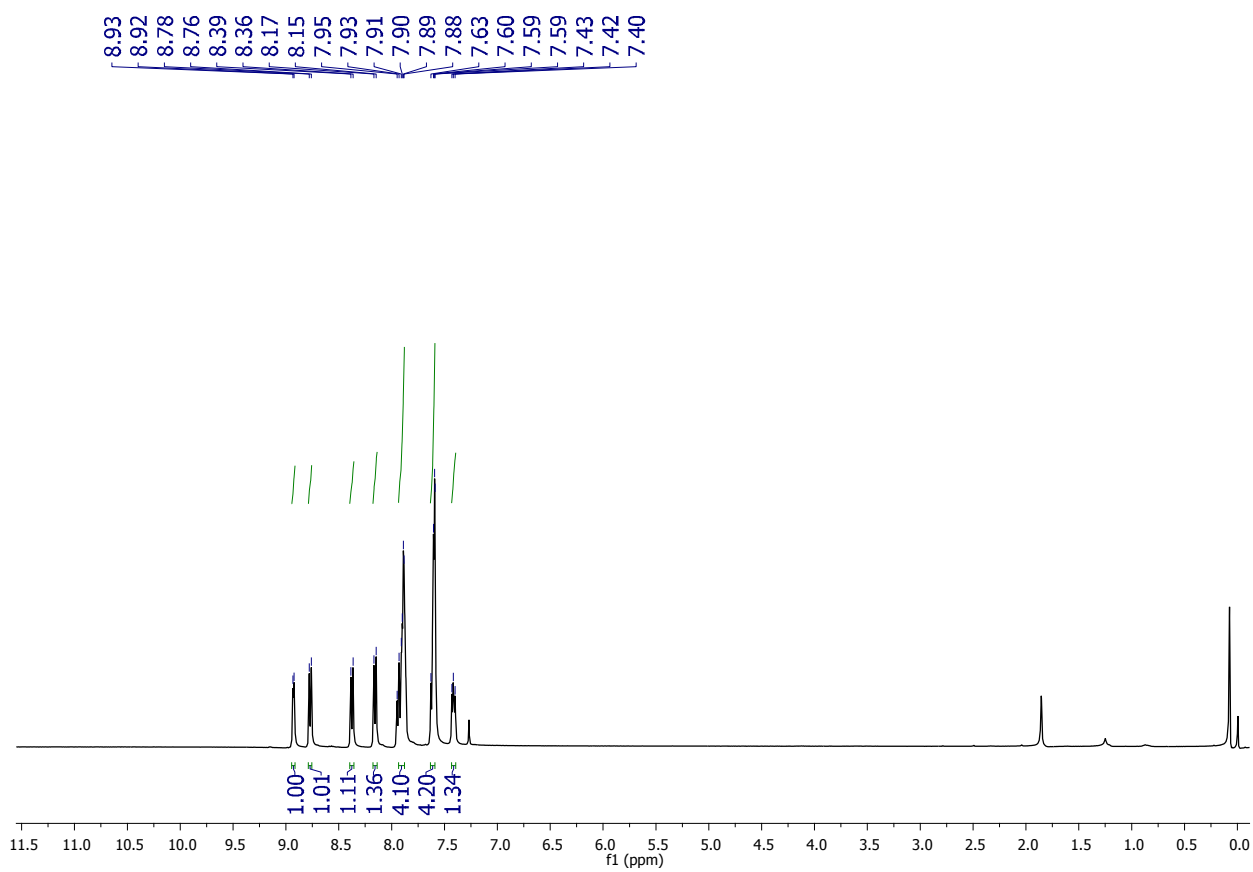

**Figure S1:**  $^1\text{H}$  NMR spectrum of **L** in  $\text{CDCl}_3$

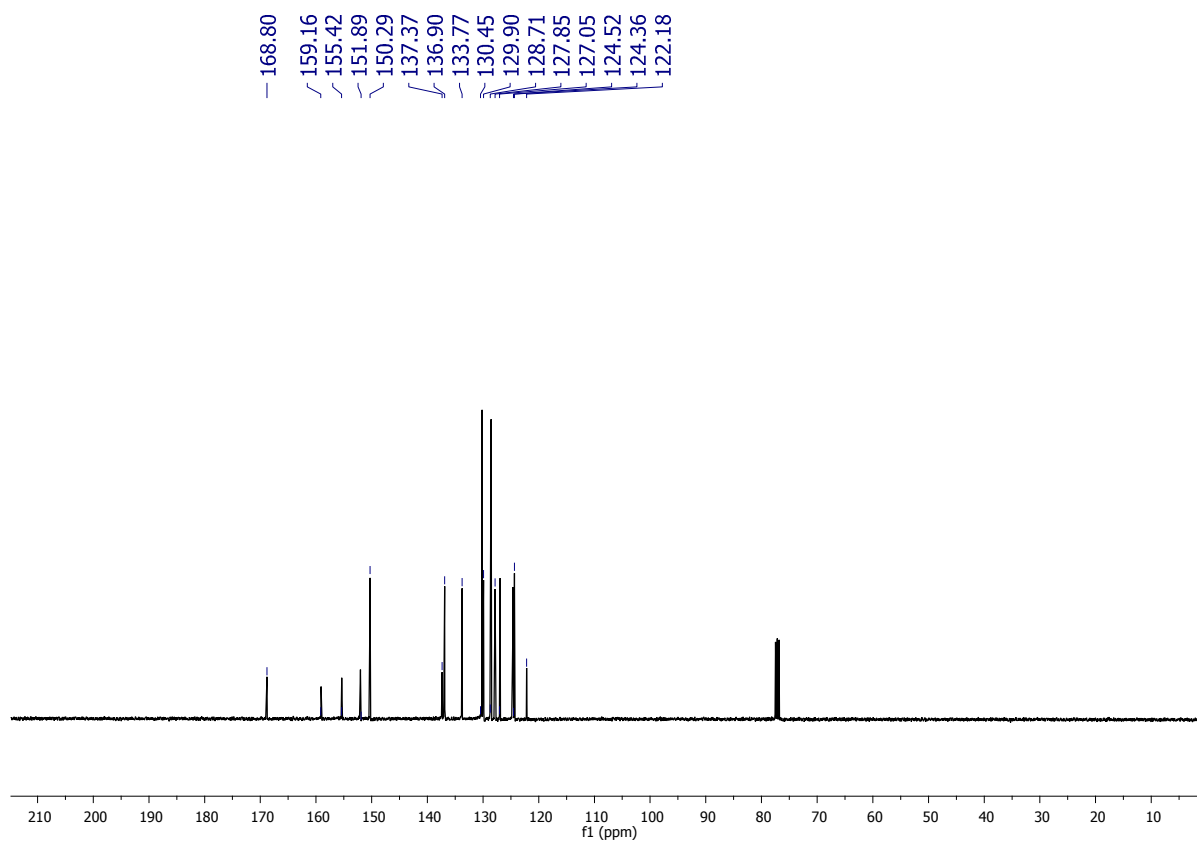

**Figure S2:**  $^{13}\text{C}$  NMR spectrum of **L** in  $\text{CDCl}_3$

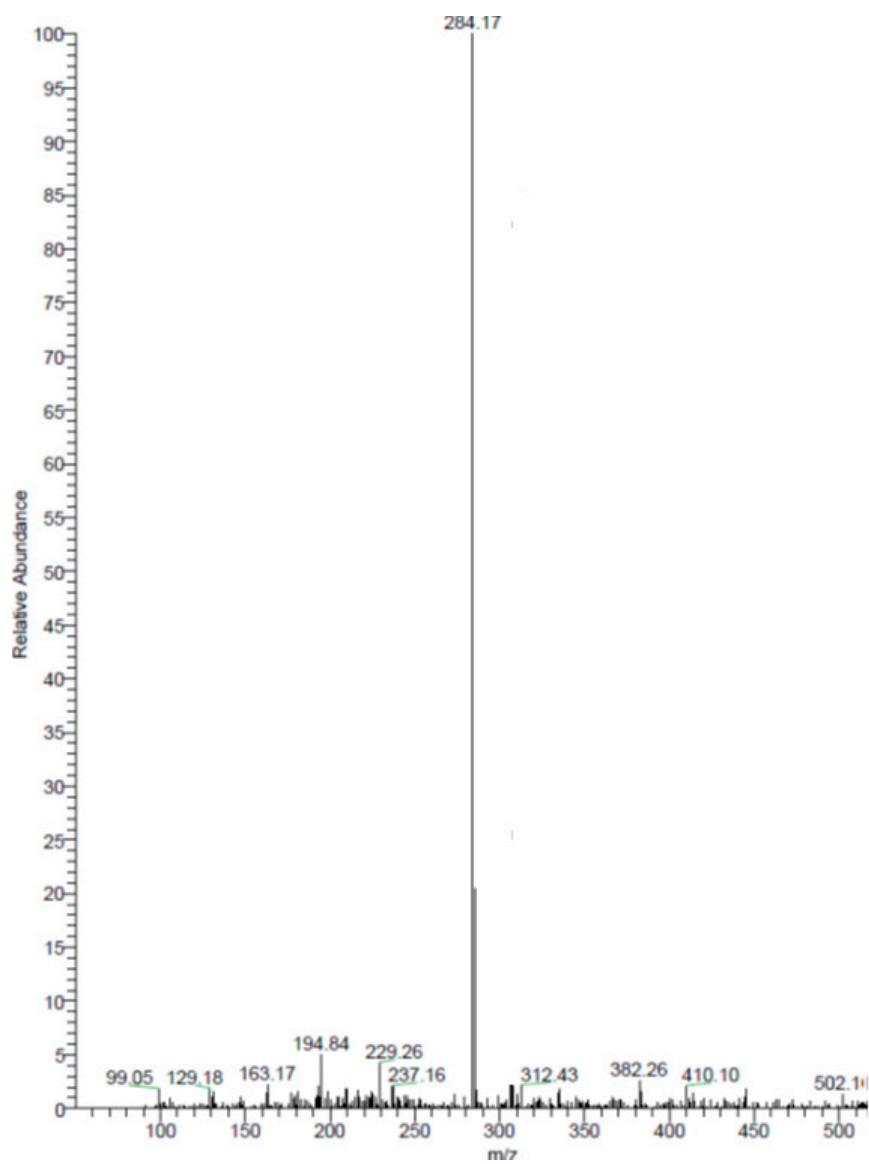

**Figure S3:** ESI-MS spectrum of L.

TQL5 #69-83 RT: 0.66-0.80 AV: 8 NL: 4.41E9  
T: FTMS + p ESI Full ms [150.00-1500.00]

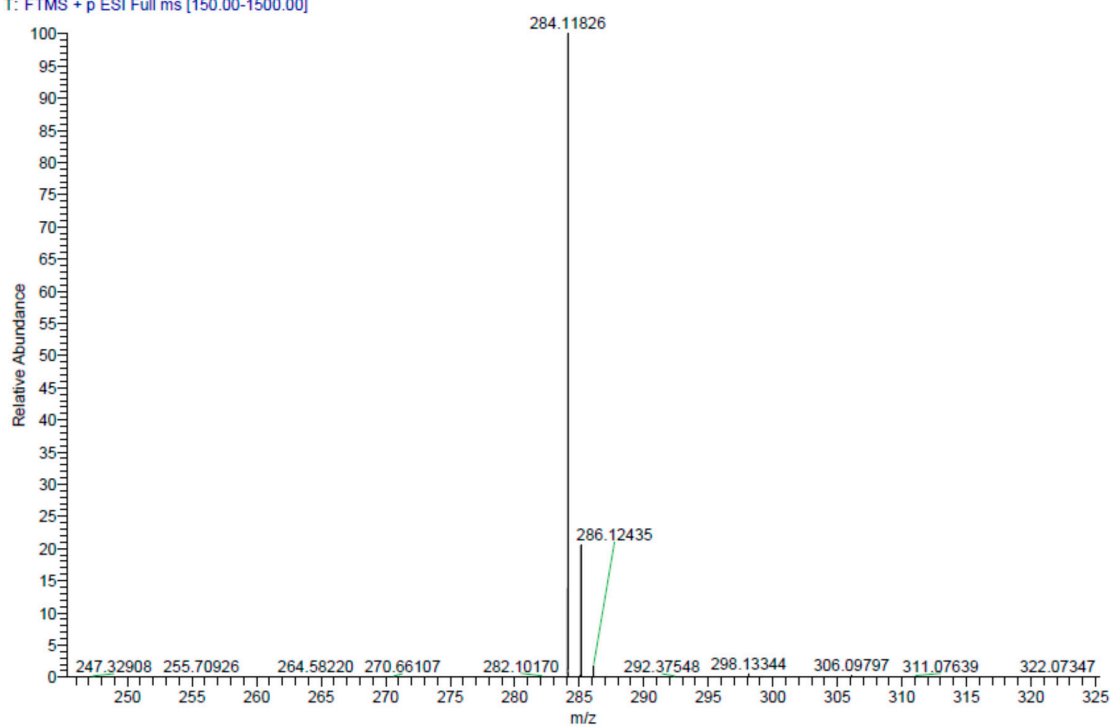

**Figure S4.** HRMS-ESI for **L**, Calcd for  $C_{19}H_{14}N_3$ : 284.1188  $[M+H]^+$ , Found: 284.1182  $[M+H]^+$ .

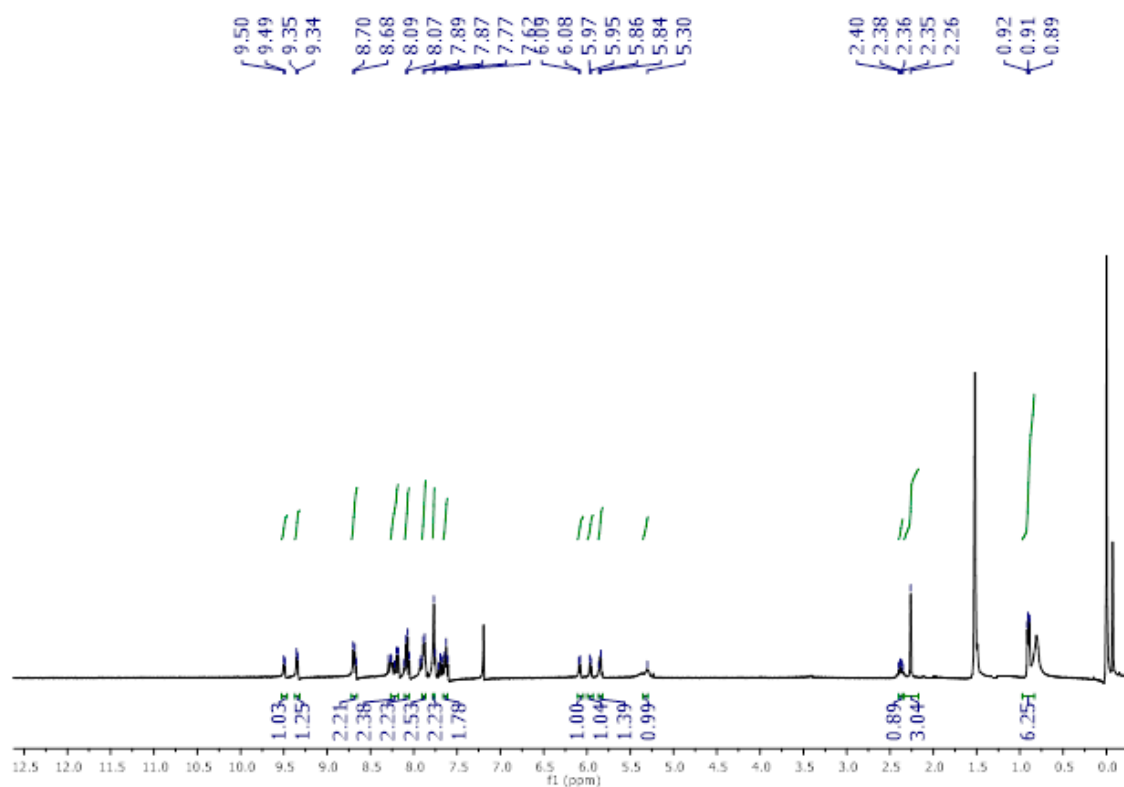

**Figure S5:**  $^1\text{H}$  NMR spectrum of TQ-5 Complex in  $\text{CDCl}_3$

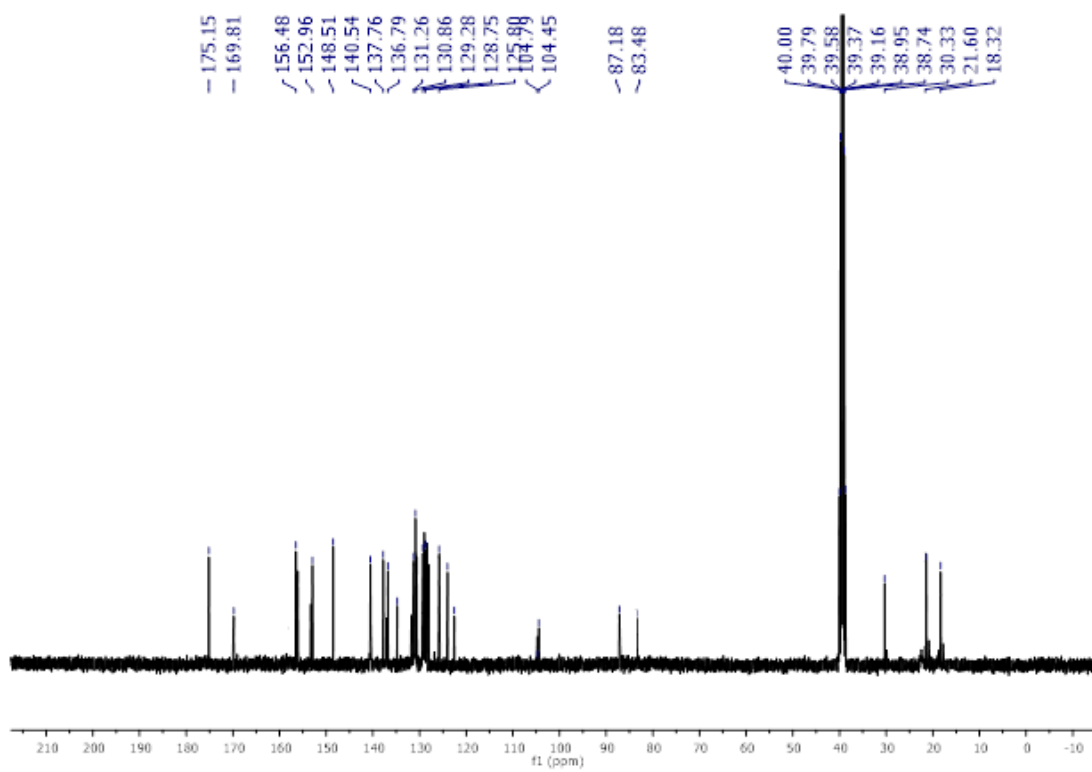

**Figure S6:**  $^{13}\text{C}$  NMR spectrum of TQ-5 complex in  $\text{DMSO-d}_6$

Q-5 #13 RT: 0.17 AV: 1 NL: 5.38E4  
: ITMS + c ESI Full ms [50.00-1200.00]

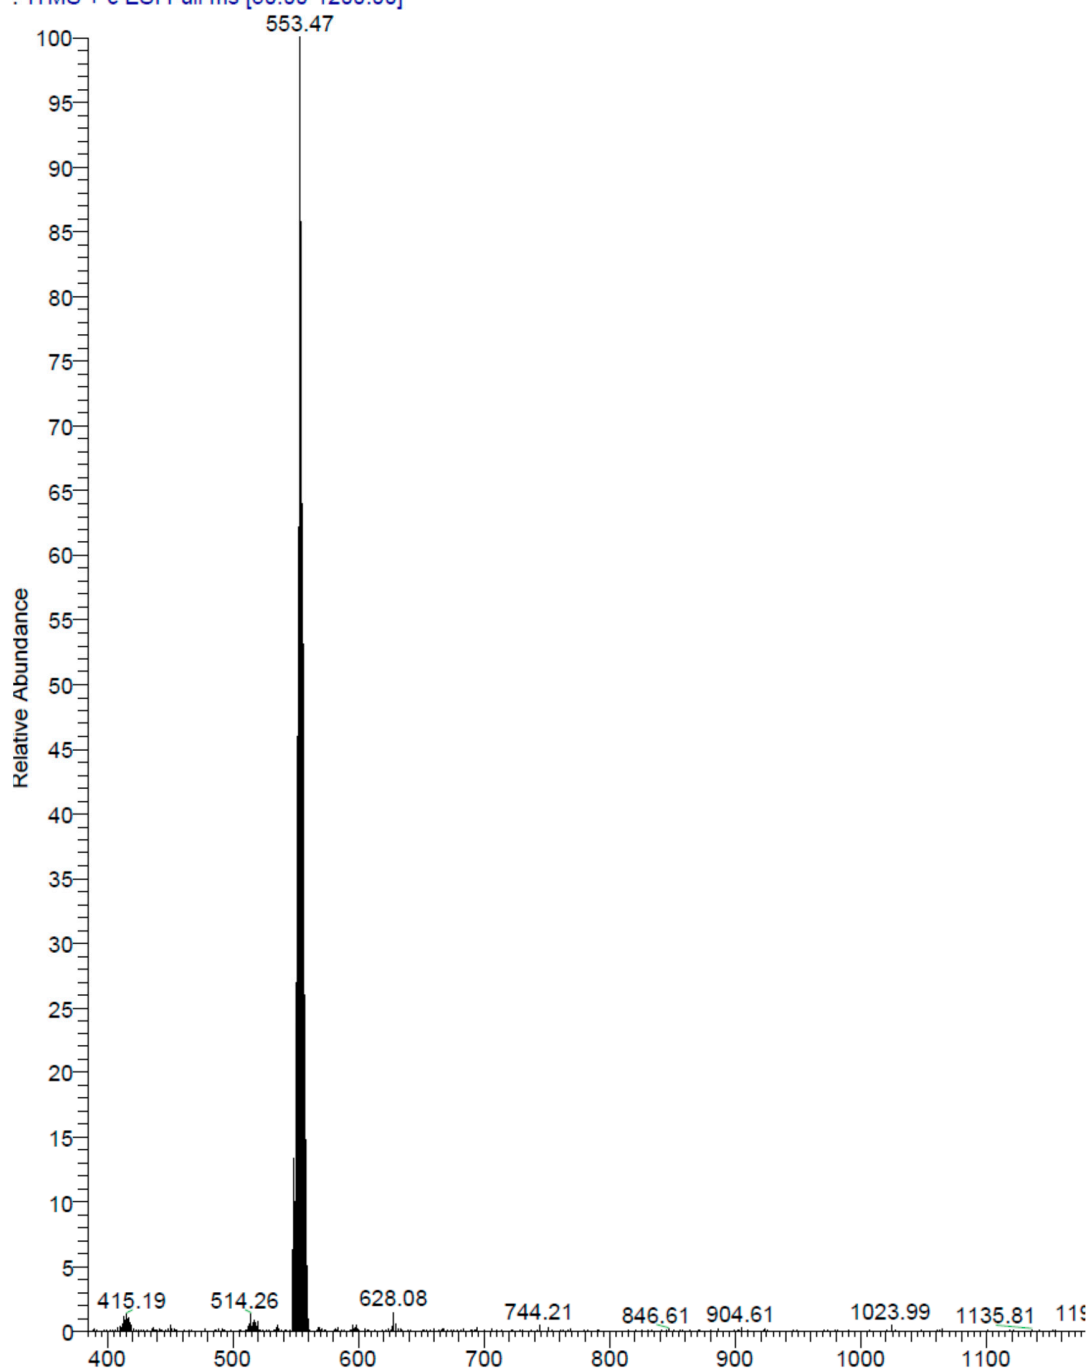

Figure S7: ESI-MS spectrum of TQ-5 Complex.
